# Supplementary material for: Detailed Structure and Pathophysiological Roles of the IgA-Albumin Complex in Multiple Myeloma
Source: MDPI journal article supplement (doi:10.3390/ijms22041766), 2021-02-10
Supplement: s1 [file s1]

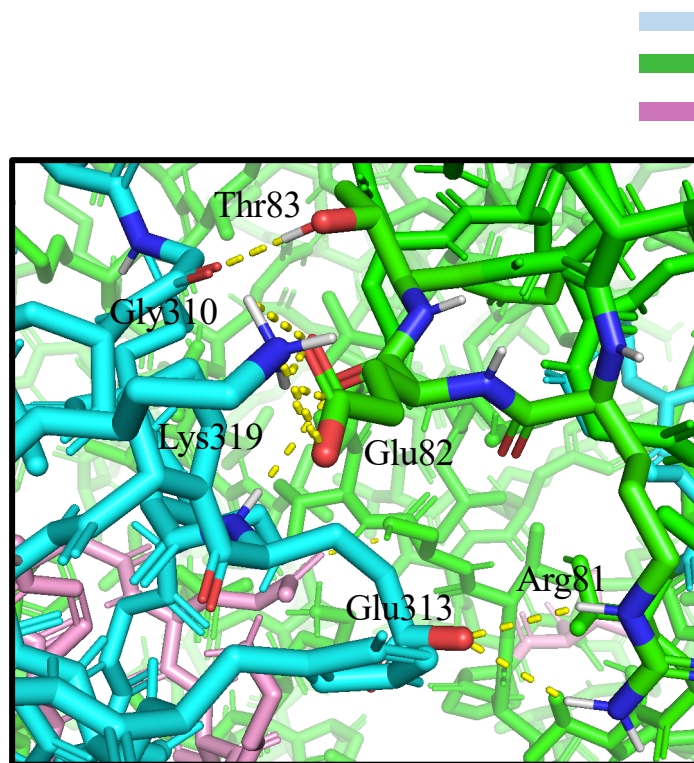

■ IgA  $\alpha$  chain Fc region  
■ Albumin  
■ Immunoglobulin J chain

| IgA $\alpha$ chain Fc region | Albumin |
|------------------------------|---------|
| Lys319                       | Glu82   |
| Gly310                       | Thr83   |
| Glu313                       | Arg81   |
| Arg392                       | Glu505  |
| Glu393                       | Lys573  |
| Glu389                       | Lys500  |

**Supplemental Figure 1. Noncovalent molecular interactions between IgA and albumin**  
 Gray, IgA  $\alpha$  chain Fc region; Green, albumin; Purple, immunoglobulin J chain.  
 Detailed molecular model creation procedures are described in the text.
